# Supplementary material for: Tissue-Based Proteomic Profiling in Patients with Hyperplasia and Endometrial Cancer
Source: MDPI journal article supplement (doi:10.3390/cells11132119), 2022-07-05
Supplement: s1 [file s1]

Supplementary Data:

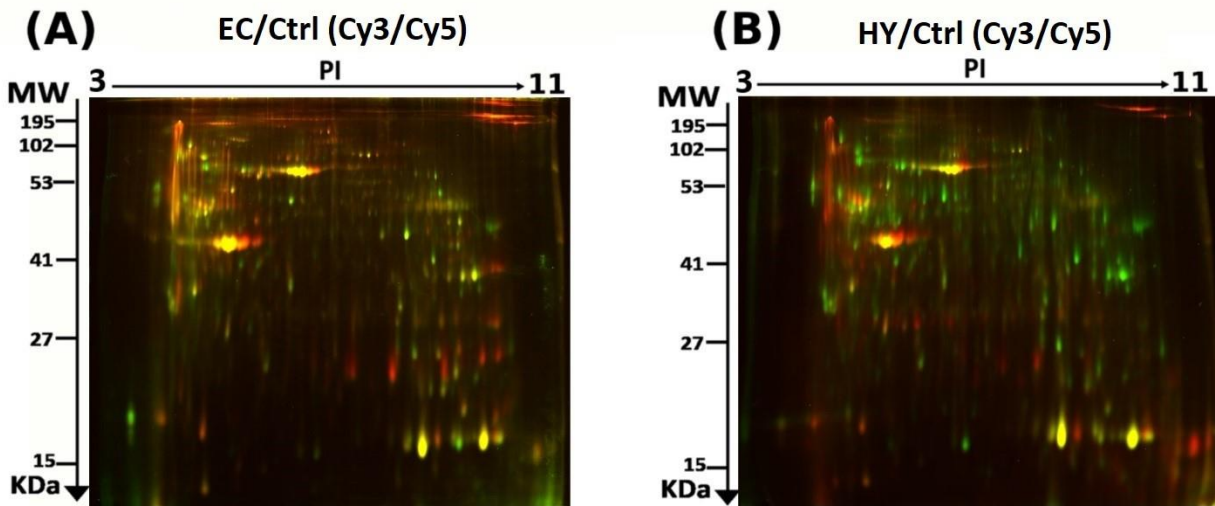

Figure S1. Representative overlay of Cy3(Green)/Cy5(Red) images of (A) EC/Ctrl; (B) representative overlay of Cy3(Green)/Cy5(Red) images of HY/Ctrl, respectively.

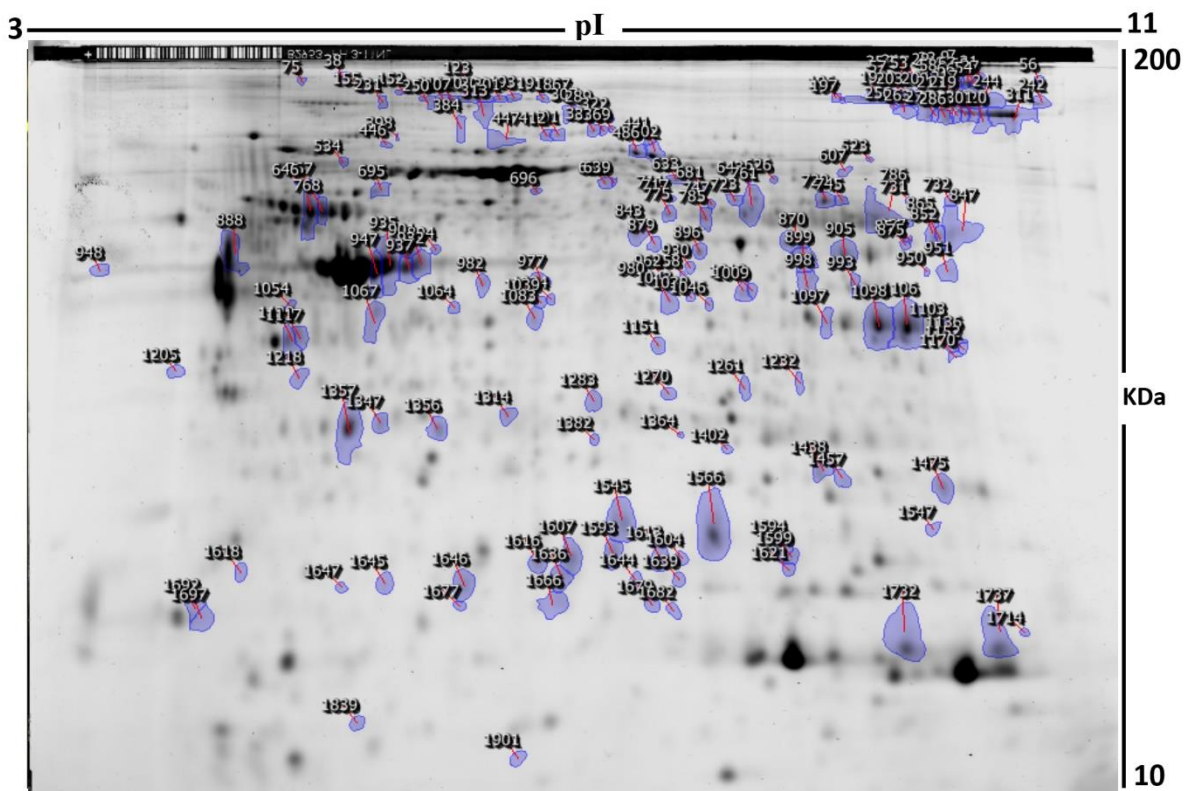

Figure S2: Representative image of statistically significant differential expression (ANOVA  $P \leq 0.05$ ) protein spots (numbered spots) between EC, HY, and Ctrl in the human endometrial tissues.

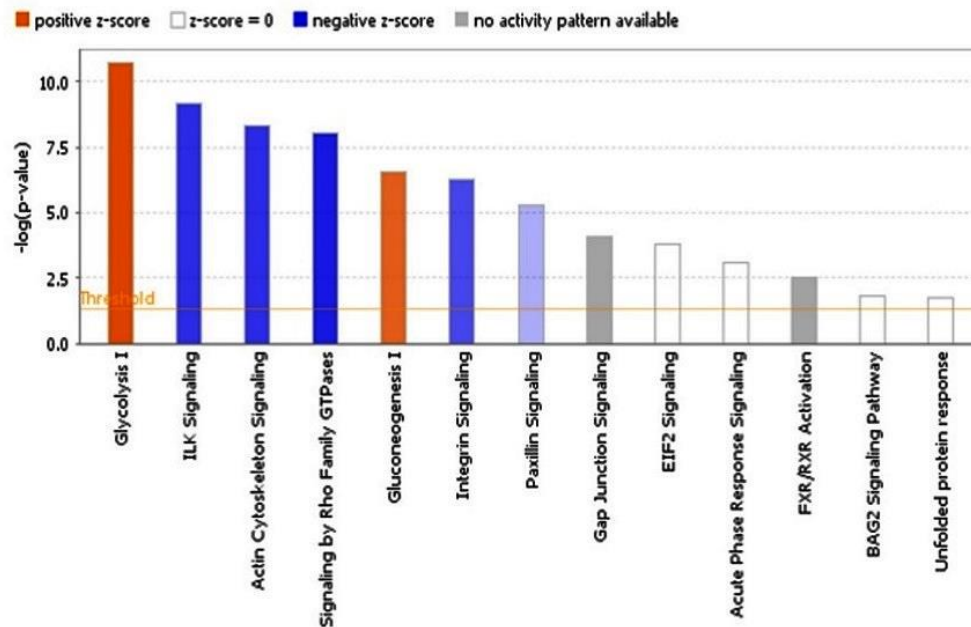

**Figure S3.** The diagram shows the top canonical pathways ranked by the *P*-values obtained by the Ingenuity Pathway Analysis (IPA) performed for all the 32 differentially regulated proteins between EC and HY states.

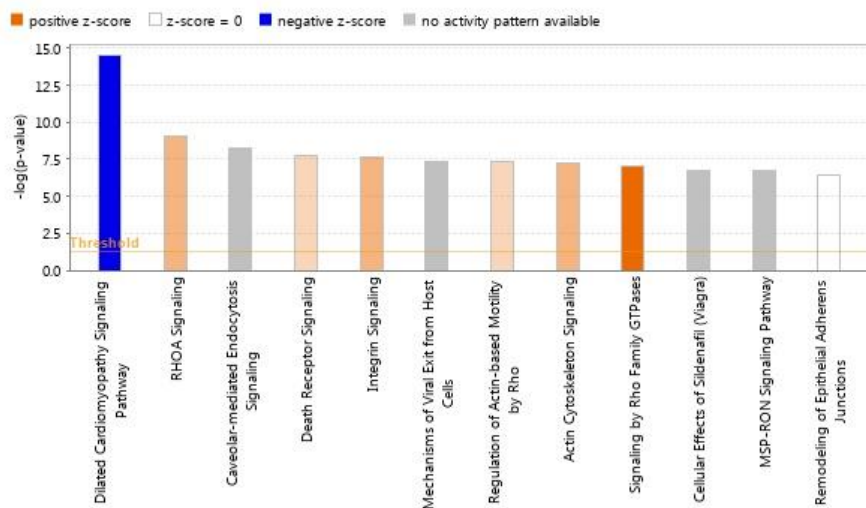

**Figure S4.** Top canonical pathways ranked by the *P*-values obtained using Ingenuity Pathway Analysis (IPA) performed for all differentially regulated proteins between EC and Ctrl states.

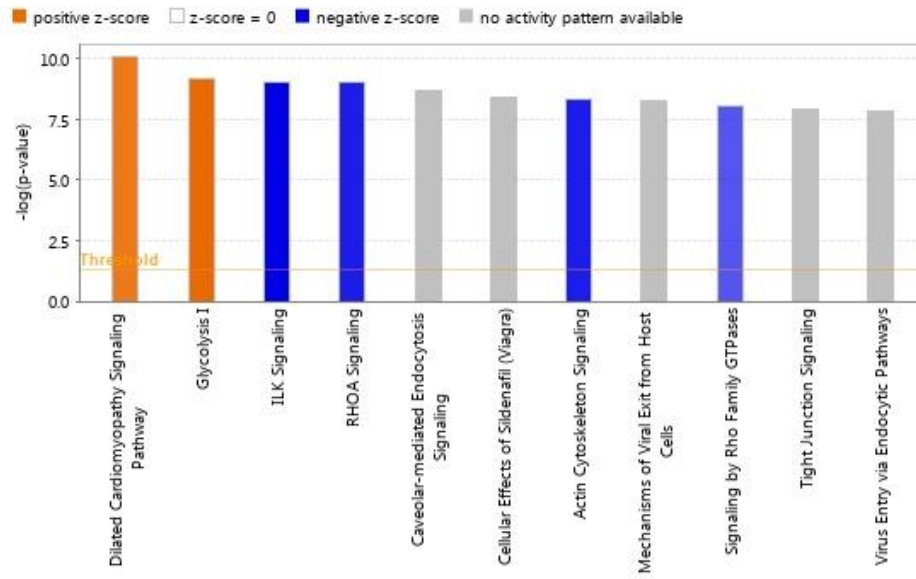

**Figure S5.** Top canonical pathways ranked by the P-values obtained using Ingenuity Pathway Analysis (IPA) performed for all differentially regulated proteins between HY and Ctrl states.

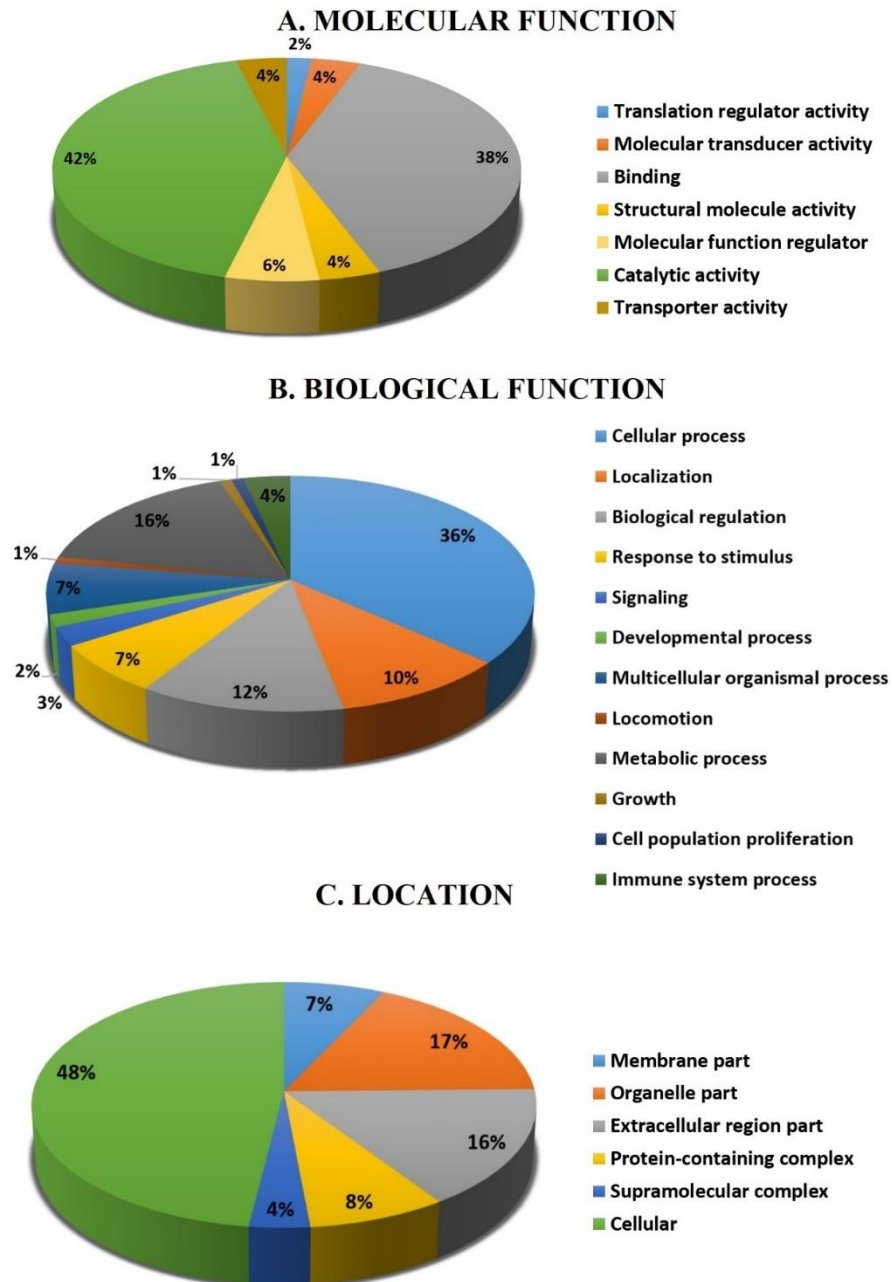

**Figure S6.** Comparative depiction (%) of identified proteins categorized into groups according to their Molecular Function (A), Biological Function (B), and Location (C).

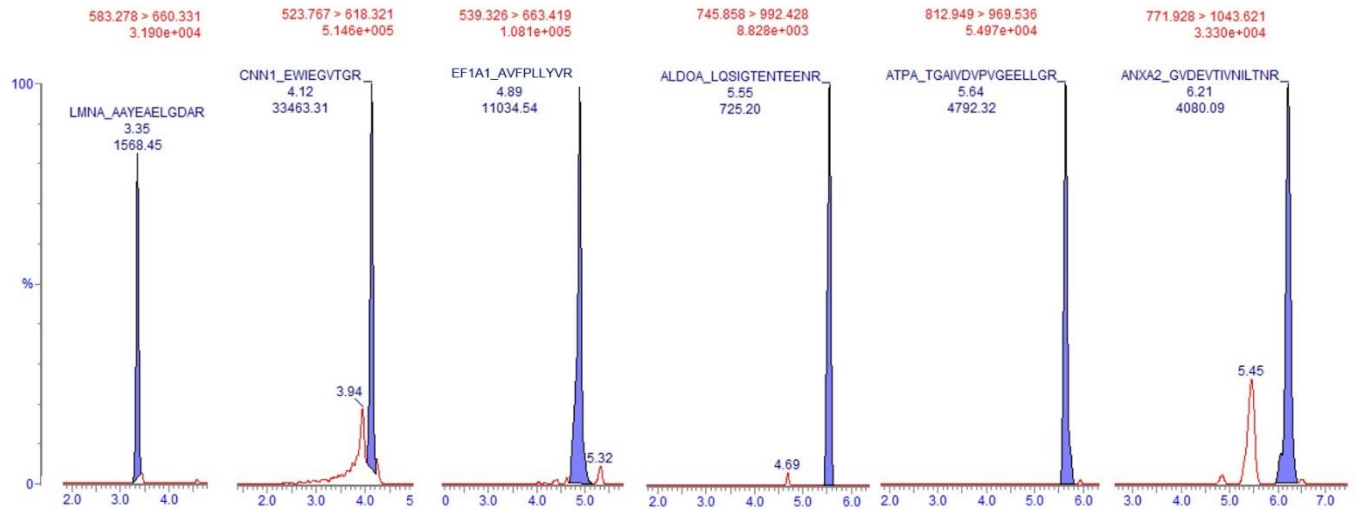

**Figure S7.** Representative extracted ion chromatograms for the selected proteins' signature peptides based on the multiple-reaction monitoring method developed for validation.

### Confirmation of changes in Selected Proteins by Immunoblotting

Immunoblotting assay was performed in the current study to further confirm the findings. Four proteins with statistically significant differential abundance were chosen and determined by immunoblotting. Primary monoclonal antibodies against Alpha-enolase (ENOA), Glyceraldehyde-3-phosphate dehydrogenase (G3P), Annexin A5 (ANXA5), Apolipoprotein A-I (APOA1), and beta actin ( $\beta$ -actin) were used. An equal amount of protein (5  $\mu$ g) from each sample from the three groups (EC = 10, HY = 10, and EC = 10, i.e. 50  $\mu$ g from each group) was taken and pooled together; one-dimensional discontinuous slab gel electrophoresis (12% sodium dodecyl sulfate (SDS)-polyacrylamide gel) was used to separate. A mini trans-blot electrotransfer cell (BioRad, California, CA, USA) was employed to transfer proteins from the run gels to an Immobilon-P, polyvinylidene difluoride (PVDF) transfer membrane (Millipore, Massachusetts, MA, USA). To test the efficiency of the transfer, the membranes were stained with Ponceau-S. Subsequently, the membranes were blocked with tris-buffered saline (TBS) containing 5% fat-free milk (FFM), for one hour at room temperature, and then the membranes were rinsed three times with TBS-T in 10 mM Tris-HCl, 150 mM NaCl, 0.1% Tween 20 buffer. After rinsing, the membranes were incubated with the selected primary antibodies at dilution of (1:200) using a blocking buffer. Membranes were then incubated with the matched immunoglobulin G (IgG)-horseradish peroxidase (HRP)-conjugated secondary antibody, and the enhanced chemiluminescence (ECL, Thermo Fisher Scientific, Massachusetts, MA, USA) was used to detect the immunoreactive bands. These bands were visualized by scanning with Sapphire Biomolecular Imager (Azure Bio systems, Dublin, OH, USA) and digitalized via the image analysis software Sapphire Capture system (Azure Biosystems, Dublin, OH, USA).

Immunoblot assay confirmed the expression of the selected proteins (Figure S8). The proteins selected for confirmation were ENOA, G3P, ANXA5, and APOA1. Immunoblots revealed that the endometrial tissue protein expression of G3P, APOA1, and ENOA1 was upregulated in EC compared to HY and Ctrl. ANXA5 was found to be downregulated in EC compared to HY and Ctrl. Immunoblot data were normalized to the housekeeping protein  $\beta$ -actin. Similar results for expression of proteins were found with the 2D-DIGE experiment.

**A**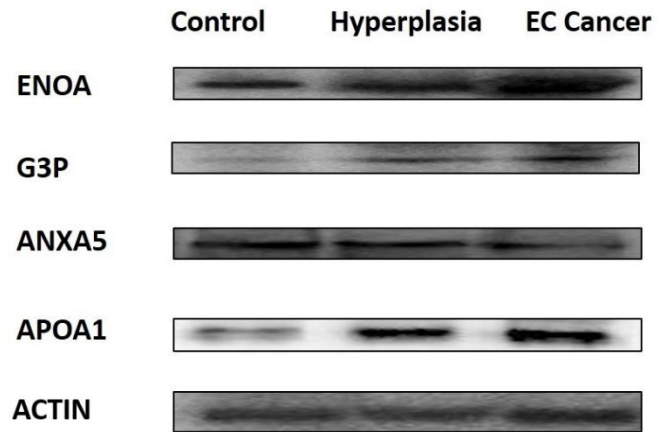**B**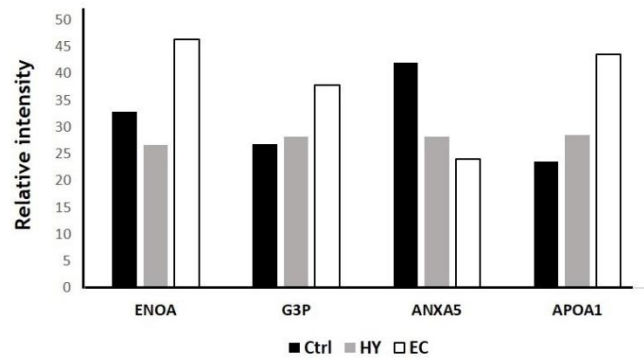

**Figure S8.** Western blot assay of the chosen proteins identified by 2D-DIGE analysis. Samples from Ctrl, EC, and HY groups were pooled together and used for Western blot analysis. The results of Western blot study were similar to the findings of 2D-DIGE (A). Graphical analysis of the relative expression data of normalized protein blots between the Ctrl, HY, and EC is shown. The presented data are shown as histograms of the mean  $\pm$  SD (B).

**Table S1.** Clinicopathological characteristics of the 36 female patients enrolled in the study

| Sample ID | Sample type | Age | Diagnosis                               | Stage/Grade |
|-----------|-------------|-----|-----------------------------------------|-------------|
| EC1       | Cancer      | 71  | Endometrioid endometrial adenocarcinoma | 1A/G2       |
| EC2       | Cancer      | 74  | Endometrioid endometrial adenocarcinoma | 1A/G2       |
| EC 3      | Cancer      | 76  | Endometrioid endometrial adenocarcinoma | 1A/G1       |
| EC 4      | Cancer      | 61  | Endometrioid endometrial adenocarcinoma | 1B/G3       |
| EC 5      | Cancer      | 56  | Endometrioid endometrial adenocarcinoma | 1B/G1       |
| EC 6      | Cancer      | 50  | Endometrioid endometrial adenocarcinoma | 1A/G1       |
| EC 7      | Cancer      | 46  | Endometrioid endometrial adenocarcinoma | 3A/GA       |
| EC 8      | Cancer      | 70  | Endometrioid endometrial adenocarcinoma | 3C/G3       |
| EC 9      | Cancer      | 69  | Endometrioid endometrial adenocarcinoma | 3C/G2       |
| EC 10     | Cancer      | 51  | Endometrioid endometrial adenocarcinoma | 3A/G2       |
| EC 11     | Cancer      | 74  | Endometrioid endometrial adenocarcinoma | 1A/G3       |
| EC 12     | Cancer      | 61  | Endometrioid endometrial adenocarcinoma | 1A/G2       |
| HY1       | Hyperplasia | 55  | hyperplastic endometrium without atypia |             |
| HY2       | Hyperplasia | 58  | hyperplastic endometrium with atypia    |             |
| HY3       | Hyperplasia | 53  | hyperplastic endometrium with atypia    |             |
| HY4       | Hyperplasia | 61  | hyperplastic endometrium with atypia    |             |
| HY5       | Hyperplasia | 67  | hyperplastic endometrium without atypia |             |
| HY6       | Hyperplasia | 60  | hyperplastic endometrium with atypia    |             |
| HY7       | Hyperplasia | 67  | hyperplastic endometrium with atypia    |             |
| HY8       | Hyperplasia | 49  | hyperplastic endometrium with atypia    |             |
| HY9       | Hyperplasia | 62  | hyperplastic endometrium with atypia    |             |
| HY10      | Hyperplasia | 60  | hyperplastic endometrium with atypia    |             |
| HY11      | Hyperplasia | 67  | hyperplastic endometrium with atypia    |             |
| HY12      | Hyperplasia | 61  | hyperplastic endometrium with atypia    |             |
| Ctrl1     | Control     | 52  | Normal endometrium                      |             |
| Ctrl 2    | Control     | 59  | Normal endometrium                      |             |
| Ctrl 3    | Control     | 63  | Normal endometrium                      |             |
| Ctrl 4    | Control     | 61  | Normal endometrium                      |             |
| Ctrl 5    | Control     | 63  | Normal endometrium                      |             |
| Ctrl 6    | Control     | 57  | Normal endometrium                      |             |
| Ctrl 7    | Control     | 62  | Normal endometrium                      |             |
| Ctrl8     | Control     | 56  | Normal endometrium                      |             |
| Ctrl 9    | Control     | 60  | Normal endometrium                      |             |
| Ctrl 10   | Control     | 58  | Normal endometrium                      |             |
| Ctrl 11   | Control     | 50  | Normal endometrium                      |             |
| Ctrl 12   | Control     | 56  | Normal endometrium                      |             |

**Table S2.** Experimental design: 36 samples run on 18 2D-PAGE gels, samples were labeled randomly with Cy3 and Cy5, and a pooled sample was used as an internal standard and was stained with Cy2 (EC: cancer, HY: hyperplasia, Ctrl: controls).

| Gel | Cy3    | Cy5    | Cy2           |
|-----|--------|--------|---------------|
| 1   | HY1    | EC1    | Pooled sample |
| 2   | Ctrl1  | HY2    | Pooled sample |
| 3   | EC2    | Ctrl2  | Pooled sample |
| 4   | HY3    | EC3    | Pooled sample |
| 5   | Ctrl3  | HY4    | Pooled sample |
| 6   | EC4    | Ctrl4  | Pooled sample |
| 7   | HY5    | EC5    | Pooled sample |
| 8   | Ctrl5  | HY6    | Pooled sample |
| 9   | EC6    | Ctrl6  | Pooled sample |
| 10  | HY7    | EC7    | Pooled sample |
| 11  | Ctrl7  | HY8    | Pooled sample |
| 12  | EC8    | Ctrl8  | Pooled sample |
| 13  | HY9    | EC9    | Pooled sample |
| 14  | Ctrl9  | HY10   | Pooled sample |
| 15  | EC10   | Ctrl10 | Pooled sample |
| 16  | HY11   | EC11   | Pooled sample |
| 17  | Ctrl11 | HY12   | Pooled sample |
| 18  | EC12   | Ctrl12 | Pooled sample |

**Table S3.** Mass spectrometry list of significant differentially abundant proteins between EC, HY, and Ctrl states identified in endometrial tissue samples, using 2D-DIGE MALDI-TOF. Protein name, accession number, Mascot score, MS% coverage, protein MW, and pI values according to Uniprot database are listed.

| Sl no: | Spot No <sup>a</sup> | Accession No <sup>b</sup> | Protein Name                                | MASCOT ID   | Pi <sup>c</sup> | MW <sup>d</sup> | Cov% | Score <sup>e</sup> | Matching peptides |
|--------|----------------------|---------------------------|---------------------------------------------|-------------|-----------------|-----------------|------|--------------------|-------------------|
| 1      | 36                   | A6NI72                    | Putative neutrophil cytosol factor 1B       | NCF1B_HUMAN | 9.20            | 45017           | 30   | 57                 | 8                 |
| 2      | 23                   | P62736                    | Actin, aortic smooth muscle                 | ACTA_HUMAN  | 5.23            | 42381           | 31   | 90                 | 12                |
| 3      | 937                  | P63267                    | Actin, gamma-enteric smooth muscle          | ACTH_HUMAN  | 5.31            | 42108           | 62   | 155                | 20                |
| 4      | 54                   | P07311                    | Acylphosphatase-1                           | ACYP1_HUMAN | 9.30            | 11954           | 39   | 57                 | 7                 |
| 5      | 932                  | P63267                    | Actin, alpha cardiac muscle 1               | ACTC_HUMAN  | 5.23            | 42334           | 52   | 195                | 22                |
| 6      | 1218                 | O00299                    | Chloride intracellular channel protein 1    | CLIC1_HUMAN | 5.09            | 27248           | 52   | 130                | 12                |
| 7      | 58                   | Q9UI15                    | Transgelin-3                                | TAGL3_HUMAN | 6.84            | 22629           | 66   | 62                 | 10                |
| 8      | 847                  | P68104                    | Elongation factor 1-<br>alpha 1             | EF1A1_HUMAN | 9.10            | 50457           | 42   | 71                 | 18                |
| 9      | 852                  | P42331                    | Rho GTPase-<br>activating protein 25        | RHG25_HUMAN | 6.04            | 73902           | 15   | 58                 | 6                 |
| 10     | 1677                 | P02792                    | Ferritin light chain                        | FRIL_HUMAN  | 5.51            | 20064           | 61   | 113                | 13                |
| 11     | 1099                 | P07355                    | Annexin A2                                  | ANXA2_HUMAN | 7.57            | 38808           | 72   | 181                | 28                |
| 12     | 1645                 | Q01995                    | Transgelin                                  | TAGL_HUMAN  | 8.87            | 22653           | 35   | 66                 | 10                |
| 13     | 767                  | P06576                    | ATP synthase subunit<br>beta, mitochondrial | ATPB_HUMAN  | 5.26            | 56525           | 59   | 128                | 35                |
| 14     | 626                  | P01024                    | Complement C3                               | CO3_HUMAN   | 6.02            | 188569          | 34   | 158                | 52                |
| 15     | 290                  | Q00536                    | Cyclin-dependent<br>kinase 16               | CDK16_HUMAN | 7.23            | 55909           | 23   | 63                 | 10                |
| 16     | 244                  | Q9UI15                    | Transgelin-3                                | TAGL3_HUMAN | 6.84            | 22629           | 66   | 65                 | 11                |
| 17     | 1613                 | P62736                    | Actin, aortic smooth<br>muscle              | ACTA_HUMAN  | 5.23            | 42381           | 42   | 82                 | 14                |
| 18     | 865                  | P68104                    | Elongation factor 1-<br>alpha 1             | EF1A1_HUMAN | 9.10            | 50451           | 32   | 76                 | 13                |
| 19     | 1347                 | P63261                    | Actin, cytoplasmic 2                        | ACTG_HUMAN  | 5.31            | 42108           | 33   | 79                 | 14                |
| 20     | 993                  | P04075                    | Fructose-<br>bisphosphate aldolase<br>A     | ALDOA_HUMAN | 8.30            | 39851           | 81   | 192                | 25                |
| 21     | 1117                 | P08758                    | Annexin A5                                  | ANXA5_HUMAN | 4394            | 35971           | 45   | 128                | 14                |

|    |      |        |                                            |             |      |       |    |     |    |
|----|------|--------|--------------------------------------------|-------------|------|-------|----|-----|----|
| 22 | 729  | P50991 | T-complex protein 1 subunit delta          | TCPD_HUMAN  | 7.96 | 58401 | 36 | 94  | 21 |
| 23 | 291  | P34932 | Heat shock 70 kDa protein 4                | HSP74_HUMAN | 5.11 | 95127 | 29 | 57  | 20 |
| 24 | 1103 | P09651 | Heterogeneous nuclear ribonucleoprotein A1 | ROA1_HUMAN  | 9.17 | 38837 | 45 | 94  | 17 |
| 25 | 1593 | Q01995 | Transgelin                                 | TAGL_HUMAN  | 8.87 | 2268  | 56 | 91  | 16 |
| 26 | 1647 | P60709 | Actin, cytoplasmic 1                       | ACTB_HUMAN  | 5.29 | 42052 | 32 | 88  | 12 |
| 27 | 962  | P60709 | Actin, cytoplasmic 1                       | ACTB_HUMAN  | 5.29 | 42052 | 45 | 159 | 20 |
| 28 | 215  | Q9UI15 | Transgelin-3                               | TAGL3_HUMAN | 6.84 | 22629 | 72 | 66  | 14 |
| 29 | 1644 | Q01995 | Transgelin                                 | TAGL_HUMAN  | 8.87 | 22653 | 62 | 107 | 24 |
| 30 | 1639 | P13645 | Keratin, type I cytoskeletal 10            | K1C10_HUMAN | 5.13 | 59020 | 39 | 116 | 26 |
| 31 | 320  | Q96NL8 | Protein C8orf37                            | CH037_HUMAN | 6.52 | 23993 | 55 | 58  | 15 |
| 32 | 1697 | P60660 | Myosin light polypeptide 6                 | MYL6_HUMAN  | 4.56 | 17090 | 70 | 76  | 13 |
| 33 | 638  | O75083 | WD repeat-containing protein 1             | WDR1_HUMAN  | 6.17 | 66836 | 25 | 74  | 14 |
| 34 | 279  | Q99615 | DnaJ homolog subfamily C member 7          | DNJC7_HUMAN | 6.56 | 57203 | 18 | 62  | 10 |
| 35 | 947  | P63267 | Actin, gamma-enteric smooth muscle         | ACTH_HUMAN  | 5.23 | 42334 | 75 | 183 | 32 |
| 36 | 207  | P60709 | Actin, cytoplasmic 1                       | ACTB_HUMAN  | 5.29 | 42052 | 41 | 104 | 21 |
| 37 | 1692 | P24844 | Myosin regulatory light polypeptide 9      | MYL9_HUMAN  | 4.80 | 19871 | 52 | 70  | 12 |
| 38 | 950  | P13645 | Keratin, type I cytoskeletal 10            | K1C10_HUMAN | 5.13 | 59020 | 34 | 74  | 19 |
| 39 | 935  | P68032 | Actin, alpha cardiac muscle 1              | ACTC_HUMAN  | 5.23 | 59020 | 34 | 74  | 10 |
| 40 | 646  | P17661 | Desmin                                     | DESM_HUMAN  | 5.21 | 53560 | 80 | 251 | 41 |
| 41 | 1679 | P17661 | Desmin                                     | DESM_HUMAN  | 5.21 | 53560 | 46 | 104 | 23 |

|    |      |        |                                                    |             |      |        |    |     |    |
|----|------|--------|----------------------------------------------------|-------------|------|--------|----|-----|----|
| 42 | 696  | P02768 | Albumin                                            | ALBU_HUMAN  | 5.92 | 71317  | 51 | 120 | 31 |
| 43 | 1136 | P51911 | Calponin-1                                         | CNN1_HUMAN  | 9.14 | 33321  | 50 | 78  | 20 |
| 44 | 761  | P14618 | Pyruvate kinase PKM                                | KPYM_HUMAN  | 7.96 | 58470  | 21 | 61  | 10 |
| 45 | 307  | P63267 | Actin, alpha cardiac muscle 1                      | ACTC_HUMAN  | 5.23 | 42334  | 74 | 169 | 29 |
| 46 | 785  | P62736 | Actin, aortic smooth muscle                        | ACTA_HUMAN  | 5.33 | 42381  | 39 | 130 | 21 |
| 47 | 723  | P14618 | Pyruvate kinase PKM                                | KPYM_HUMAN  | 7.96 | 58470  | 50 | 114 | 27 |
| 48 | 1636 | Q01995 | Transgelin                                         | TAGL_HUMAN  | 8.87 | 22653  | 46 | 67  | 13 |
| 49 | 711  | P25705 | ATP synthase subunit alpha, mitochondria           | ATPA_HUMAN  | 9.16 | 59828  | 41 | 82  | 22 |
| 50 | 209  | O60304 | Zinc finger protein 500                            | ZN500_HUMAN | 6.84 | 54553  | 23 | 57  | 8  |
| 51 | 899  | P04075 | Fructose-bisphosphate aldolase A                   | ALDOA_HUMAN | 8.30 | 39851  | 76 | 211 | 30 |
| 52 | 901  | P63267 | Actin, gamma-enteric smooth muscle                 | ACTH_HUMAN  | 5.31 | 42108  | 71 | 198 | 30 |
| 53 | 534  | P17661 | Desmin                                             | DESM_HUMAN  | 5.21 | 53560  | 71 | 241 | 33 |
| 54 | 982  | O00764 | Pyridoxal kinase                                   | PDXK_HUMAN  | 5.75 | 35308  | 57 | 129 | 23 |
| 55 | 1604 | P62937 | Peptidyl-prolyl cis-trans isomerase A              | PPIA_HUMAN  | 7.68 | 18229  | 55 | 58  | 6  |
| 56 | 381  | P02768 | Albumin                                            | ALBU_HUMAN  | 5.92 | 71317  | 12 | 57  | 7  |
| 57 | 843  | P06733 | Alpha-enolase                                      | ENOA_HUMAN  | 7.01 | 47481  | 55 | 133 | 25 |
| 58 | 486  | Q9UBX3 | Mitochondrial dicarboxylate carrier                | DIC_HUMAN   | 9.62 | 31718  | 32 | 58  | 8  |
| 59 | 1106 | P02647 | Apolipoprotein A-I                                 | APOA1_HUMAN | 5.56 | 30759  | 74 | 229 | 29 |
| 60 | 1283 | P13645 | Keratin, type I cytoskeletal 10                    | K1C10_HUMAN | 5.13 | 59020  | 27 | 70  | 14 |
| 61 | 1083 | Q5T5Y3 | Calmodulin-regulated spectrin-associated protein 1 | CAMP1_HUMAN | 6.28 | 1792   | 20 | 63  | 6  |
| 62 | 208  | P12110 | Collagen alpha-2(VI)                               | CO6A2       | 5.85 | 109709 | 11 | 59  | 13 |

|    |      |        |                                           |       |      |       |    |     |    |
|----|------|--------|-------------------------------------------|-------|------|-------|----|-----|----|
|    |      |        | chain                                     |       |      |       |    |     |    |
| 63 | 998  | P04075 | Fructose-bisphosphate aldolase A          | ALDOA | 8.30 | 39851 | 31 | 69  | 9  |
| 64 | 695  | P68032 | Actin, alpha cardiac muscle 1             | ACTC  | 5.31 | 42249 | 50 | 179 | 19 |
| 65 | 1270 | P60174 | Triosephosphate isomerase                 | TPIS  | 6.45 | 26938 | 79 | 195 | 21 |
| 66 | 1732 | P07737 | Profilin-1                                | PROF1 | 8.44 | 15216 | 34 | 77  | 8  |
| 67 | 1030 | Q9NR45 | Sialic acid synthase                      | SIAS  | 6.29 | 40738 | 43 | 98  | 17 |
| 68 | 369  | P02545 | Prelamin-A/C                              | LMNA  | 6.57 | 74380 | 32 | 179 | 19 |
| 69 | 775  | P00352 | Retinal dehydrogenase 1                   | AL1A1 | 6.30 | 55454 | 48 | 164 | 27 |
| 70 | 888  | P08670 | Vimentin                                  | VIME  | 5.06 | 53676 | 69 | 201 | 34 |
| 71 | 870  | P00558 | Phosphoglycerate kinase 1                 | PGK1  | 8.30 | 44985 | 82 | 198 | 39 |
| 72 | 447  | P02768 | Albumin                                   | ALBU  | 5.92 | 71317 | 42 | 129 | 22 |
| 73 | 1043 | P14550 | Aldo-keto reductase family 1 member A1    | AK1A1 | 6.32 | 36892 | 35 | 66  | 9  |
| 74 | 1594 | Q01995 | Transgelin                                | TAGL  | 8.87 | 22653 | 70 | 101 | 19 |
| 75 | 977  | P60709 | Actin, cytoplasmic 1                      | ACTB  | 5.29 | 42052 | 57 | 207 | 27 |
| 76 | 607  | P29401 | Transketolase                             | TKT   | 7.58 | 68519 | 57 | 285 | 43 |
| 77 | 732  | P25705 | ATP synthase subunit alpha, mitochondrial | ATPA  | 9.16 | 59828 | 39 | 94  | 21 |
| 78 | 930  | P06733 | Alpha-enolase                             | ENOA  | 7.01 | 47481 | 21 | 61  | 7  |
| 79 | 1067 | P17661 | Desmin                                    | DESM  | 5.21 | 53560 | 77 | 336 | 30 |
| 80 | 1618 | Q08AG5 | Zinc finger protein 844                   | ZN844 | 9.14 | 78708 | 31 | 72  | 15 |
| 81 | 313  | P00966 | Argininosuccinate synthase                | ASSY  | 8.08 | 46786 | 19 | 59  | 9  |
| 82 | 896  | P17661 | Desmin                                    | DESM  | 5.21 | 53560 | 45 | 124 | 12 |
| 83 | 231  | P62937 | Peptidyl-prolyl cis-trans isomerase A     | PPIA  | 7.68 | 18229 | 89 | 118 | 18 |

|    |      |        |                                           |      |      |        |    |     |    |
|----|------|--------|-------------------------------------------|------|------|--------|----|-----|----|
| 84 | 905  | P04406 | Glyceraldehyde-3-phosphate dehydrogenase  | G3P  | 8.57 | 36201  | 45 | 84  | 13 |
| 85 | 1599 | P11532 | Dystrophin                                | DMD  | 5.65 | 428979 | 11 | 61  | 8  |
| 86 | 1098 | P21333 | Filamin-A                                 | FLNA | 5.70 | 283301 | 19 | 86  | 11 |
| 87 | 1046 | P25705 | ATP synthase subunit alpha, mitochondrial | ATPA | 9.16 | 59828  | 51 | 155 | 24 |

<sup>a</sup> Spot numbers.

<sup>b</sup> Protein accession number for SWISSPROT Database.

<sup>c</sup> Theoretical isoelectric point.

<sup>d</sup> Theoretical relative mass.

<sup>e</sup> MASCOT score

**Table S4.** Experimental conditions of the selected proteins' signature peptides used for proteomics validation.

| Accession Number | Protein Name                                     | Peptide Sequence [location]    | Length (AA) | Molecular weight (g/mol) | MRM Transition |                            | Cone voltage (v) | Collision energy (v) | RT (min) |
|------------------|--------------------------------------------------|--------------------------------|-------------|--------------------------|----------------|----------------------------|------------------|----------------------|----------|
|                  |                                                  |                                |             |                          | MS1 (m/z) (z)  | MS2 (m/z) (ion type)       |                  |                      |          |
| P02545           | Prelamin-A/C (LMNA)                              | K. AAYEAEELGDAR.K [79,89]      | 11          | 1165.5                   | 583.3 (+2)     | 860.4 (y8)<br>731.3 (y7)   | 35               | 21                   | 3.35     |
| P51911           | Calponin-1 (CNN1)                                | R. EWIEGVTGR.R [36,44]         | 9           | 1045.5                   | 523.8 (+2)     | 618.3 (y6)<br>731.4 (y7)   | 35               | 18                   | 4.12     |
| P68104           | Elongation factor 1-alpha 1 (EF1A1)              | K.AVFPLLYVR.R [632,640]        | 9           | 1077.6                   | 539.3 (+2)     | 663.4 (y5)<br>760.5 (y6)   | 35               | 19                   | 4.89     |
| P04075           | Fructose-bisphosphate aldolase A(ALDOA)          | R.QLLLTADDR.V [61,69]          | 9           | 1044.6                   | 522.8 (+2)     | 803.4 (y7)<br>690.3 (y6)   | 35               | 18                   | 5.55     |
| P25705           | ATP synthase subunit alpha, mitochondrial (ATPA) | R.TGAIVDVPVGEELLGR.V [134,149] | 16          | 1624.9                   | 812.9 (+2)     | 1068.6 (y10)<br>969.5 (y9) | 35               | 29                   | 5.46     |
| P07355           | Annexin A2 (ANXA2)                               | K.GVDEVTIVNILTNR.S [50,63]     | 14          | 1542.9                   | 771.9 (+2)     | 1043.6 (y9)<br>942.6 (y8)  | 35               | 27                   | 6.21     |
